# Supplementary material
Source: Springer Nature journal article supplement (https://www.springermedizin.de/resource/supplementary/12986_2010_250_MOESM2_ESM.pdf/25655680)

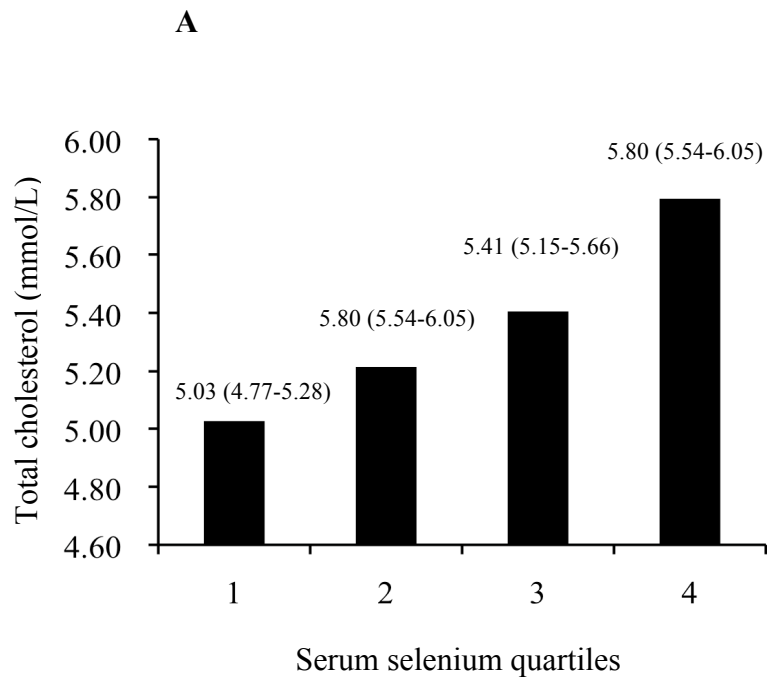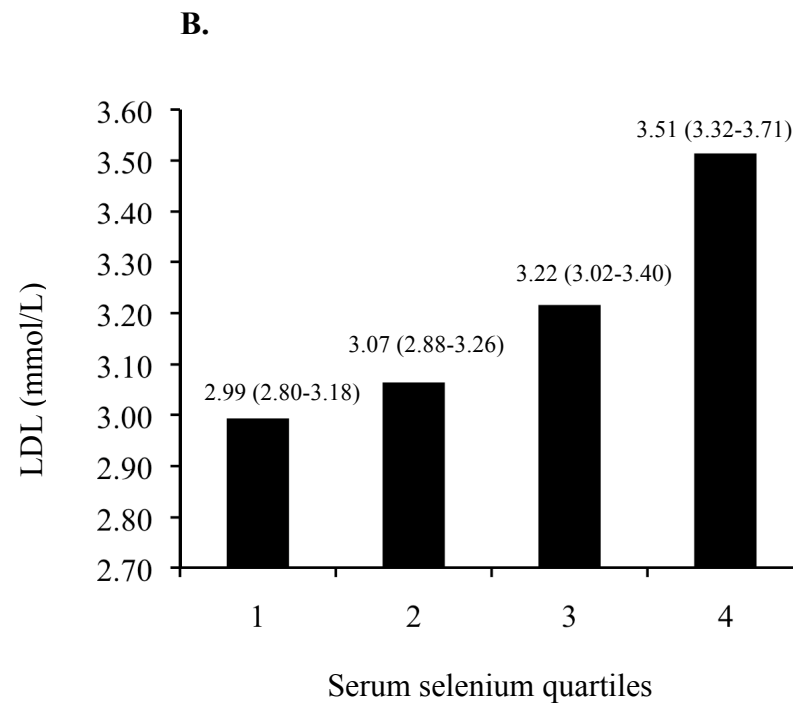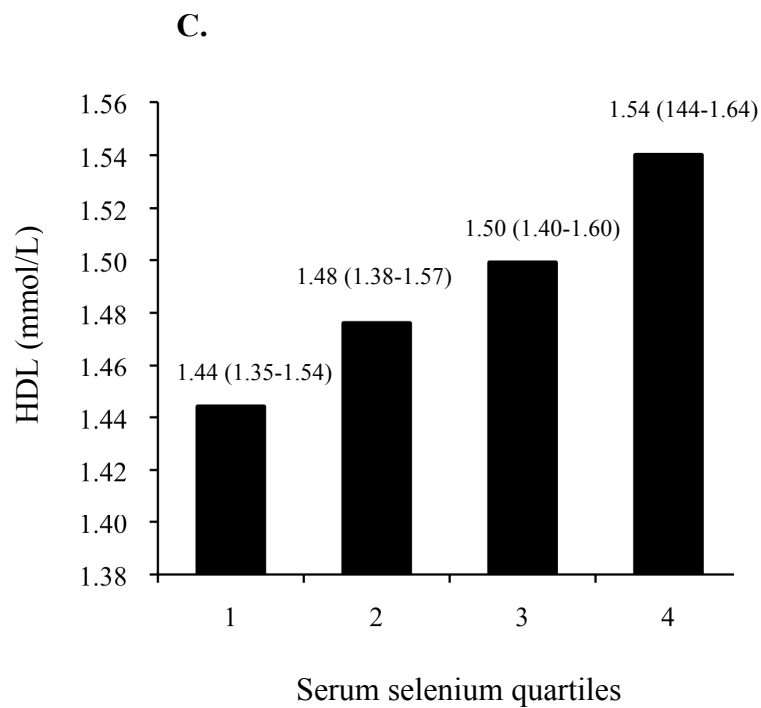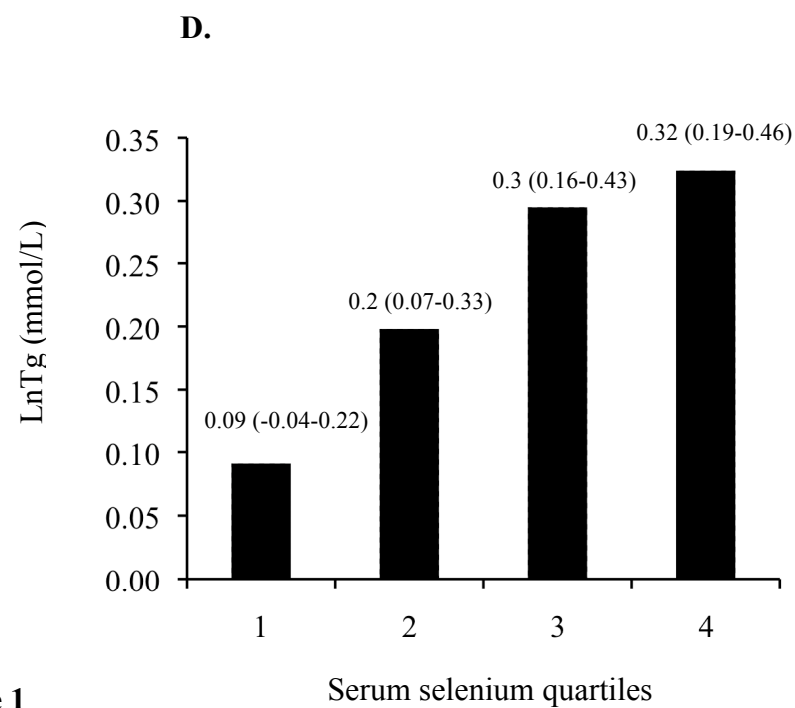

**Figure 1**

Supplement: MOESM2 [file 25655680]
